# Supplementary material for: Lactobacillus paracasei feeding improves immune control of influenza infection in mice
Source: PubMed Central journal article supplement (PMC5607164; doi:10.1371/journal.pone.0184976), 2017-09-20
Supplement: pone.0184976.s001.pdf [file pone.0184976.s001.pdf]

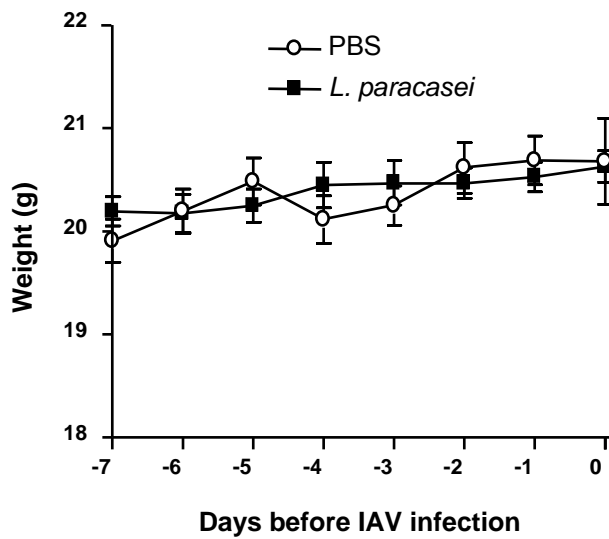

**S1 Figure. Mice weight prior to influenzae infection.** (B) Body weight of mice gavaged with *L. paracasei* CNCM I-1518 strain or PBS between D-7 and D0 (before IAV infection). Body weights of individual mice were expressed in gram as a mean of mice in each group  $\pm$ SEM.
