# Supplementary material for: Lactobacillus paracasei feeding improves immune control of influenza infection in mice
Source: PubMed Central journal article supplement (PMC5607164; doi:10.1371/journal.pone.0184976), 2017-09-20
Supplement: pone.0184976.s004.pdf [file pone.0184976.s004.pdf]

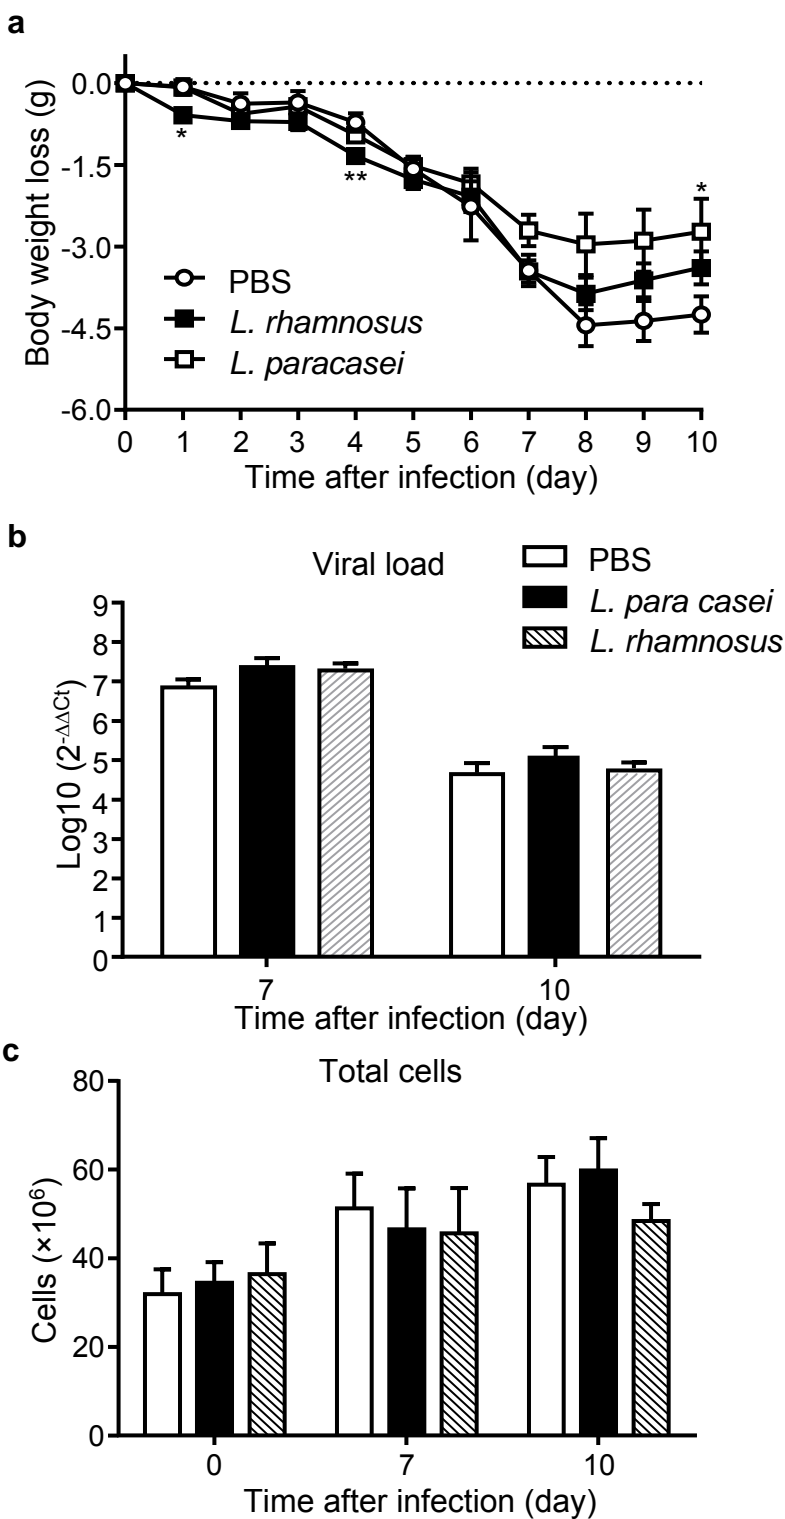

**S4 Figure. Effects of 2 others lactobacilli strains on influenza-infected mice. (A)** Body weight loss was expressed as difference between values at each time point after flu infection compared to weight at D0. The mice tested belonged to three groups: one group was fed with PBS, the second group was fed with *L. paracasei* CNCM I-3689 and the third group was fed with *L. rhamnosus* CNCM I-3690 (N = 20 in each groups) (B) Viral load measured with RTq-PCR at D7 or D10 post influenza infection in lungs of mice fed with either PBS, *L. paracasei* CNCM I-3689 or *L. rhamnosus* CNCM I-3690. N= 10 in each groups (C) Total cells counts in the lung cell suspensions quantified before (day 0) and after influenza infection (days 7 and 10), using trypan blue, N= 20 in each groups (*L. paracasei* CNCM I-3689, *L. rhamnosus* CNCM I-3690 or PBS groups).
