# Supplementary material for: Lactobacillus paracasei feeding improves immune control of influenza infection in mice
Source: PubMed Central journal article supplement (PMC5607164; doi:10.1371/journal.pone.0184976), 2017-09-20
Supplement: pone.0184976.s007.pdf [file pone.0184976.s007.pdf]

**A**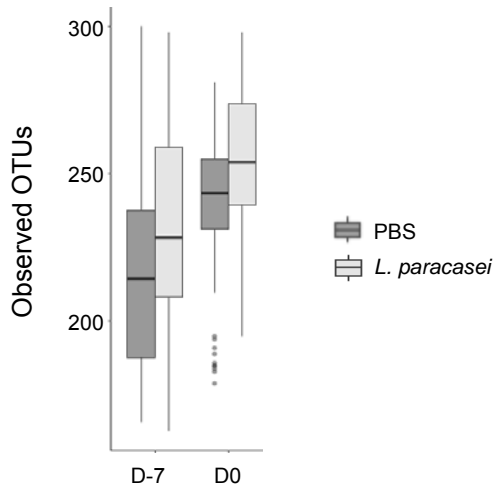**B**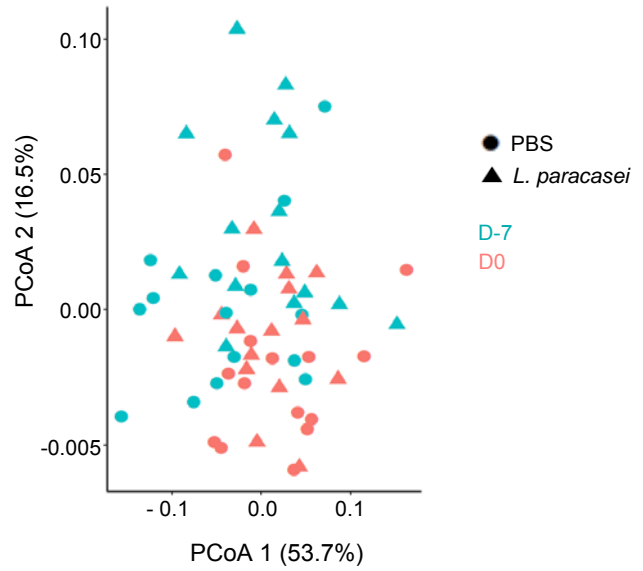

**S7 Figure. Impact of consumption of *L. paracasei* CNCM I-1518 on gut microbiota before influenza infection.** (A) Alpha-diversity measured by number of OTUs before infection (D-7 and D0). (B) Weighted Unifrac PcoA before infection (D-7 and D0).
