# Supplementary material for: Lactobacillus paracasei feeding improves immune control of influenza infection in mice
Source: PubMed Central journal article supplement (PMC5607164; doi:10.1371/journal.pone.0184976), 2017-09-20
Supplement: pone.0184976.s008.pdf [file pone.0184976.s008.pdf]

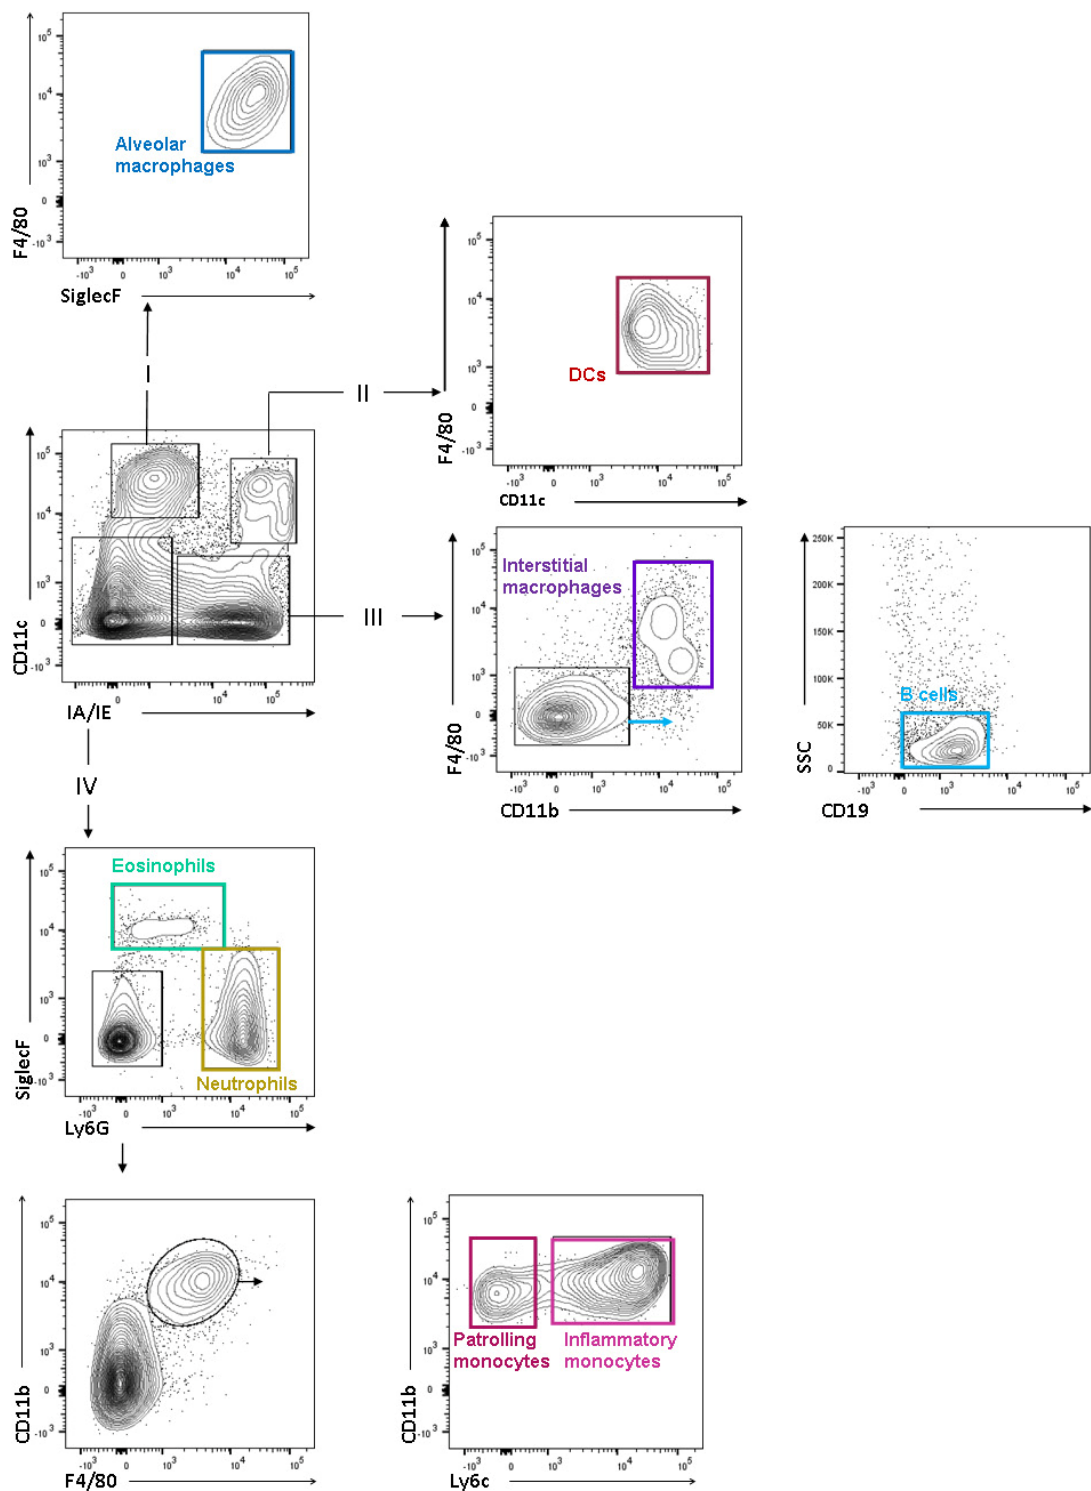

**S8 Figure. Gating strategies for flow cytometry on immune cells.** Alveolar macrophages were identified on the basis of the expression of IA/IE, CD11c, siglecF, F4/80. DCs were gated on the basis of high expression of CD11c, IA/IE and F4/80. Interstitial macrophages were identified from CD11c<sup>-</sup>, IA/IE<sup>+</sup> cells on the basis of their expression of both CD11b and F4/80 expression. B cells were identified on the basis of their expression of IA/IE and CD19 after gating out interstitial macrophages. CD11c<sup>-</sup>, IA/IE<sup>-</sup> are composed of eosinophils, neutrophils and monocytes that were gated as follow: Eosinophils were identified on the basis of their high expression of siglecF and intermediate expression of Ly6G. Neutrophils were identified on the basis of their expression of Ly6G. Monocytes were identified as F4/80 intermediate on Ly6G- and SiglecF- after gating out neutrophils and eosinophils. Monocytes were then separated into inflammatory monocytes Ly6c<sup>+</sup> and patrolling monocytes CD11b<sup>+</sup>.
